# Supplementary material
Source: PubMed Central journal article supplement (PMC4850360)

Figure Captions:

Figure. S1 Functionally meaningful ICA components that were not matched to any of the 9 adult networks.

Figure. S2 ICA components showing apparent artifacts.

Figure. S3 Comparisons of functional connectivity measurements between different preprocessing methods-Method 1: Scrubbing with the threshold of frame-wise displacement  $<0.5$  mm or signal intensity change  $<0.5\%$  together with global signal regression (0.5mm Scrubbing+GSR, as reported in the main results); Method 2: Scrubbing with the threshold of frame-wise displacement  $<0.2$  mm and signal intensity change  $<0.3\%$  together with global signal regression (0.2mm Scrubbing+GSR); Method 3: Scrubbing with the threshold of frame-wise displacement  $<0.5$  mm or signal intensity change  $<0.5\%$  without global signal regression (0.5mm Scrubbing). a). Regional level functional connectivity comparisons. The first column shows the relationship of 528 regional connectivity values between Method 1 (0.5mm Scrubbing+GSR) and Method 2 (0.2mm Scrubbing+GSR) while the second column shows the relationship of 528 regional connectivity values between Method 1 (0.5mm Scrubbing+GSR) and Method 3 (0.5mm Scrubbing). b). Network level functional connectivity comparisons. The first column shows the relationship of 45 network-level connectivity values between Method 1(0.5mm Scrubbing+GSR) and Method 2 (0.2mm Scrubbing+GSR) while the second column shows the relationship of 45 network-level connectivity values between Method 1 (0.5mm Scrubbing+GSR) and Method 3 (0.5mm Scrubbing).

Figure. S4 Comparisons of the growth trajectories of the 7 networks between different preprocessing methods-Method 1: Scrubbing with the threshold of frame-wise displacement  $<0.5$  mm or signal intensity change  $<0.5\%$  together with global signal regression (0.5mm Scrubbing+GSR, as reported in the main results); Method 2: Scrubbing with the threshold of frame-wise displacement  $<0.2$  mm and signal intensity change  $<0.3\%$  together with global signal regression (0.2mm Scrubbing+GSR); Method 3: Scrubbing with the threshold of frame-wise displacement  $<0.5$  mm or signal intensity change  $<0.5\%$  without global signal regression (0.5mm Scrubbing).

Table. S1 Comparisons of motion parameters through “scrubbing” between different age groups.

|                        | <b>Yr0<br/>(M±SD)</b> | <b>Yr1<br/>(M±SD)</b> | <b>Yr2<br/>(M±SD)</b> | <b>P(Yr0,<br/>Yr1)</b> | <b>P(Yr1,<br/>Yr2)</b> | <b>P(Yr0,<br/>Yr2)</b> |
|------------------------|-----------------------|-----------------------|-----------------------|------------------------|------------------------|------------------------|
| <b>FD_before</b>       | 0.23±0.22             | 0.12±0.09             | 0.14±0.14             | 6.20e-7                | 0.32                   | 4.49e-4                |
| <b>FD_after</b>        | 0.13±0.04             | 0.10±0.03             | 0.11±0.05             | 1.77e-9                | 0.05                   | 4.60e-3                |
| <b>N<br/>(Removed)</b> | 6.01±9.70             | 2.74±7.70             | 2.85±8.37             | 4.01e-3                | 0.92                   | 0.01                   |

FD\_before: mean framewise displacement (FD) before scrubbing; FD\_after: mean framewise displacement (FD) after scrubbing; N(removed): number of frames removed during the scrubbing process.

Table. S2 Comparisons of motion parameters through “scrubbing” between sexes.

|                        | <b>Yr0</b>             |                          |          | <b>Yr1</b>             |                          |          | <b>Yr2</b>             |                          |          |
|------------------------|------------------------|--------------------------|----------|------------------------|--------------------------|----------|------------------------|--------------------------|----------|
|                        | <b>Male<br/>(M±SD)</b> | <b>Female<br/>(M±SD)</b> | <b>P</b> | <b>Male<br/>(M±SD)</b> | <b>Female<br/>(M±SD)</b> | <b>P</b> | <b>Male<br/>(M±SD)</b> | <b>Female<br/>(M±SD)</b> | <b>P</b> |
| <b>FD_before</b>       | 0.22±0.24              | 0.25±0.20                | 0.52     | 0.12±0.10              | 0.12±0.09                | 0.39     | 0.14±0.13              | 0.14±0.15                | 0.99     |
| <b>FD_after</b>        | 0.12±0.05              | 0.13±0.04                | 0.40     | 0.10±0.14              | 0.10±0.03                | 0.50     | 0.11±0.05              | 0.11±0.06                | 0.64     |
| <b>N<br/>(Removed)</b> | 4.86±9.26              | 7.16±10.07               | 0.21     | 2.77±8.03              | 2.71±7.36                | 0.71     | 2.76±7.43              | 2.95±9.51                | 0.92     |

FD\_before: mean framewise displacement (FD) before scrubbing; FD\_after: mean framewise displacement (FD) after scrubbing; N(removed): number of frames removed during the scrubbing process.

Table. S3 Comparisons of detected significant age-dependent changes/gender effects in network-level functional connectivity among three different preprocessing methods.

| <b>Significant Functional Connectivity Decreases</b> |                                                                                                                                                                                                                                                                                                                                                    |                                                                                                                                                                                                                                                                                                                                                    |                                                                                                                                                                                                                                                                                                                                                    |
|------------------------------------------------------|----------------------------------------------------------------------------------------------------------------------------------------------------------------------------------------------------------------------------------------------------------------------------------------------------------------------------------------------------|----------------------------------------------------------------------------------------------------------------------------------------------------------------------------------------------------------------------------------------------------------------------------------------------------------------------------------------------------|----------------------------------------------------------------------------------------------------------------------------------------------------------------------------------------------------------------------------------------------------------------------------------------------------------------------------------------------------|
|                                                      | <b>0.5mm Scrubbing+GSR</b>                                                                                                                                                                                                                                                                                                                         | <b>0.2mm Scrubbing+GSR</b>                                                                                                                                                                                                                                                                                                                         | <b>0.5mm Scrubbing</b>                                                                                                                                                                                                                                                                                                                             |
| <b>Overlapping Connections</b>                       | Medial Visual--Occipital Pole<br>Medial Visual--Lateral Visual<br>Medial Visual--Auditory<br>Medial Visual--FPN R<br>Medial Visual--FPN L<br>Occipital Pole--Sensorimotor<br>Lateral Visual--Default<br>Lateral Visual--Saliency<br>Default--Sensorimotor<br>Default--Saliency<br>Sensorimotor--Auditory<br>Sensorimotor--FPN R<br>Saliency--FPN L | Medial Visual--Occipital Pole<br>Medial Visual--Lateral Visual<br>Medial Visual--Auditory<br>Medial Visual--FPN R<br>Medial Visual--FPN L<br>Occipital Pole--Sensorimotor<br>Lateral Visual--Default<br>Lateral Visual--Saliency<br>Default--Sensorimotor<br>Default--Saliency<br>Sensorimotor--Auditory<br>Sensorimotor--FPN R<br>Saliency--FPN L | Medial Visual--Occipital Pole<br>Medial Visual--Lateral Visual<br>Medial Visual--Auditory<br>Medial Visual--FPN R<br>Medial Visual--FPN L<br>Occipital Pole--Sensorimotor<br>Lateral Visual--Default<br>Lateral Visual--Saliency<br>Default--Sensorimotor<br>Default--Saliency<br>Sensorimotor--Auditory<br>Sensorimotor--FPN R<br>Saliency--FPN L |
| <b>Non-Overlapping Connections</b>                   | Occipital Pole--Auditory                                                                                                                                                                                                                                                                                                                           | Medial Visual--Sensorimotor<br>Sensorimotor--Saliency<br>Saliency--FPN R                                                                                                                                                                                                                                                                           | Occipital Pole--Lateral Visual<br>Occipital Pole--Auditory<br>Sensorimotor--Saliency<br>Saliency--FPN R                                                                                                                                                                                                                                            |
| <b>Significant Functional Connectivity Increases</b> |                                                                                                                                                                                                                                                                                                                                                    |                                                                                                                                                                                                                                                                                                                                                    |                                                                                                                                                                                                                                                                                                                                                    |
| <b>Overlapping Connections</b>                       | Lateral Visual--FPN L<br>Auditory--FPN R<br>Auditory--FPN L<br>Default--FPN R<br>FPN R--FPN L                                                                                                                                                                                                                                                      | Lateral Visual--FPN L<br>Auditory--FPN R<br>Auditory--FPN L<br>Default--FPN R<br>FPN R--FPN L                                                                                                                                                                                                                                                      | Lateral Visual--FPN L<br>Auditory--FPN R<br>Auditory--FPN L<br>Default--FPN R<br>FPN R--FPN L                                                                                                                                                                                                                                                      |
| <b>Non-Overlapping Connections</b>                   |                                                                                                                                                                                                                                                                                                                                                    |                                                                                                                                                                                                                                                                                                                                                    | Auditory--Saliency<br>Medial Visual--Default<br>Medial Visual--Saliency<br>Lateral Visual--FPN R<br>Sensorimotor--Saliency<br>Default-FPN L                                                                                                                                                                                                        |
| <b>Sex Effects</b>                                   |                                                                                                                                                                                                                                                                                                                                                    |                                                                                                                                                                                                                                                                                                                                                    |                                                                                                                                                                                                                                                                                                                                                    |
|                                                      | FPN R--FPN L<br><br>Male Growth Rate:<br>0.000269/day<br>Female Growth Rate:<br>0.000163/day<br>P<1e-4                                                                                                                                                                                                                                             | FPN R--FPN L<br><br>Male Growth Rate:<br>0.000254/day<br>Female Growth Rate:<br>0.000173/day<br>P=0.0171                                                                                                                                                                                                                                           | FPN R--FPN L<br><br>Male Growth Rate:<br>0.000319/day<br>Female Growth Rate:<br>0.000221/day<br>P=0.0214                                                                                                                                                                                                                                           |

Method 1: Scrubbing with the threshold of frame-wise displacement  $<0.5$  mm or signal intensity change  $<0.5\%$  together with global signal regression (0.5mm Scrubbing+GSR, as reported in the main results); Method 2: Scrubbing with the threshold of frame-wise displacement  $<0.2$  mm and signal intensity change  $<0.3\%$  together with global signal regression (0.2mm Scrubbing+GSR); Method 3: Scrubbing with the threshold of frame-wise displacement  $<0.5$  mm or signal intensity change  $<0.5\%$  without global signal regression (0.5mm Scrubbing). Overlapping connections represent those that were consistently detected to be significant by all three methods while non-overlapping connections were those detected by only one or two methods. For sex effects, the male/female growth rate as well as the p-values for the Age\*Gender interaction term were listed for each method.

**Neonates**

**1-year-old**

**2-year-old**

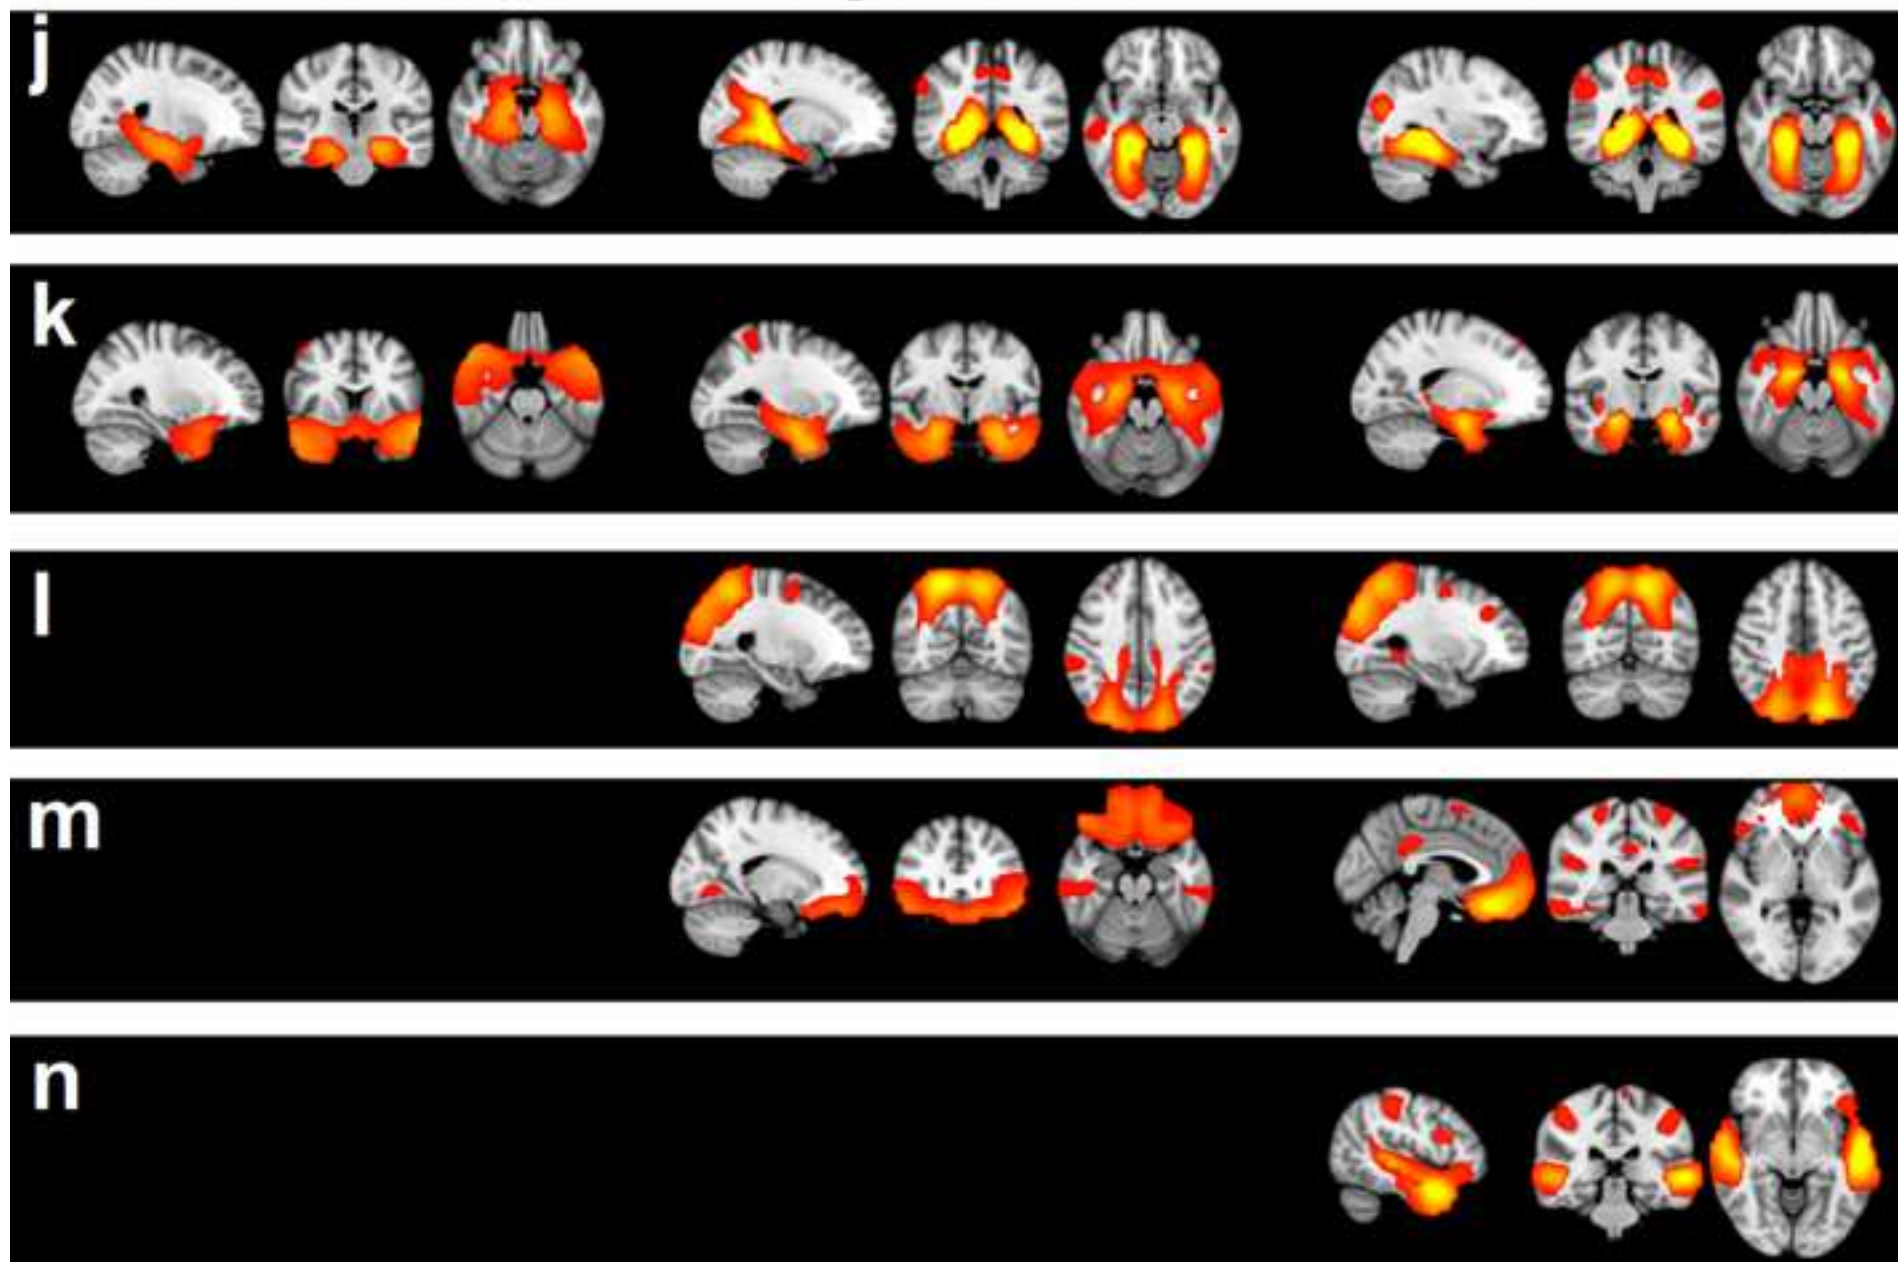

**Neonates**

**1-year-old**

**2-year-old**

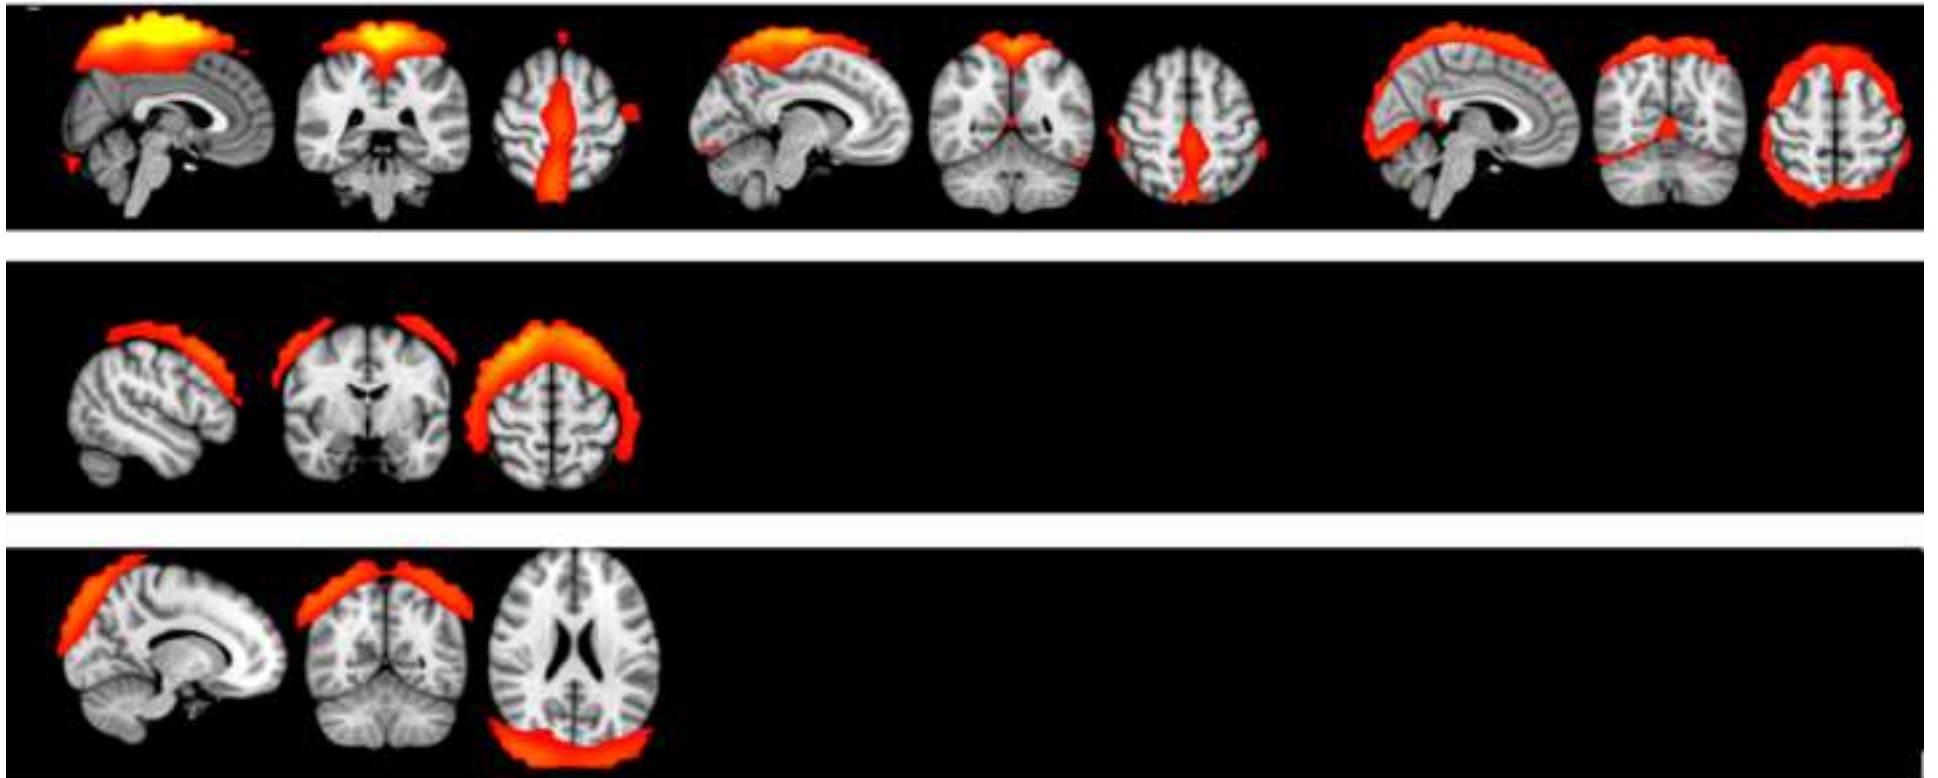

Figure. S3  
[Click here to download high resolution image](#)

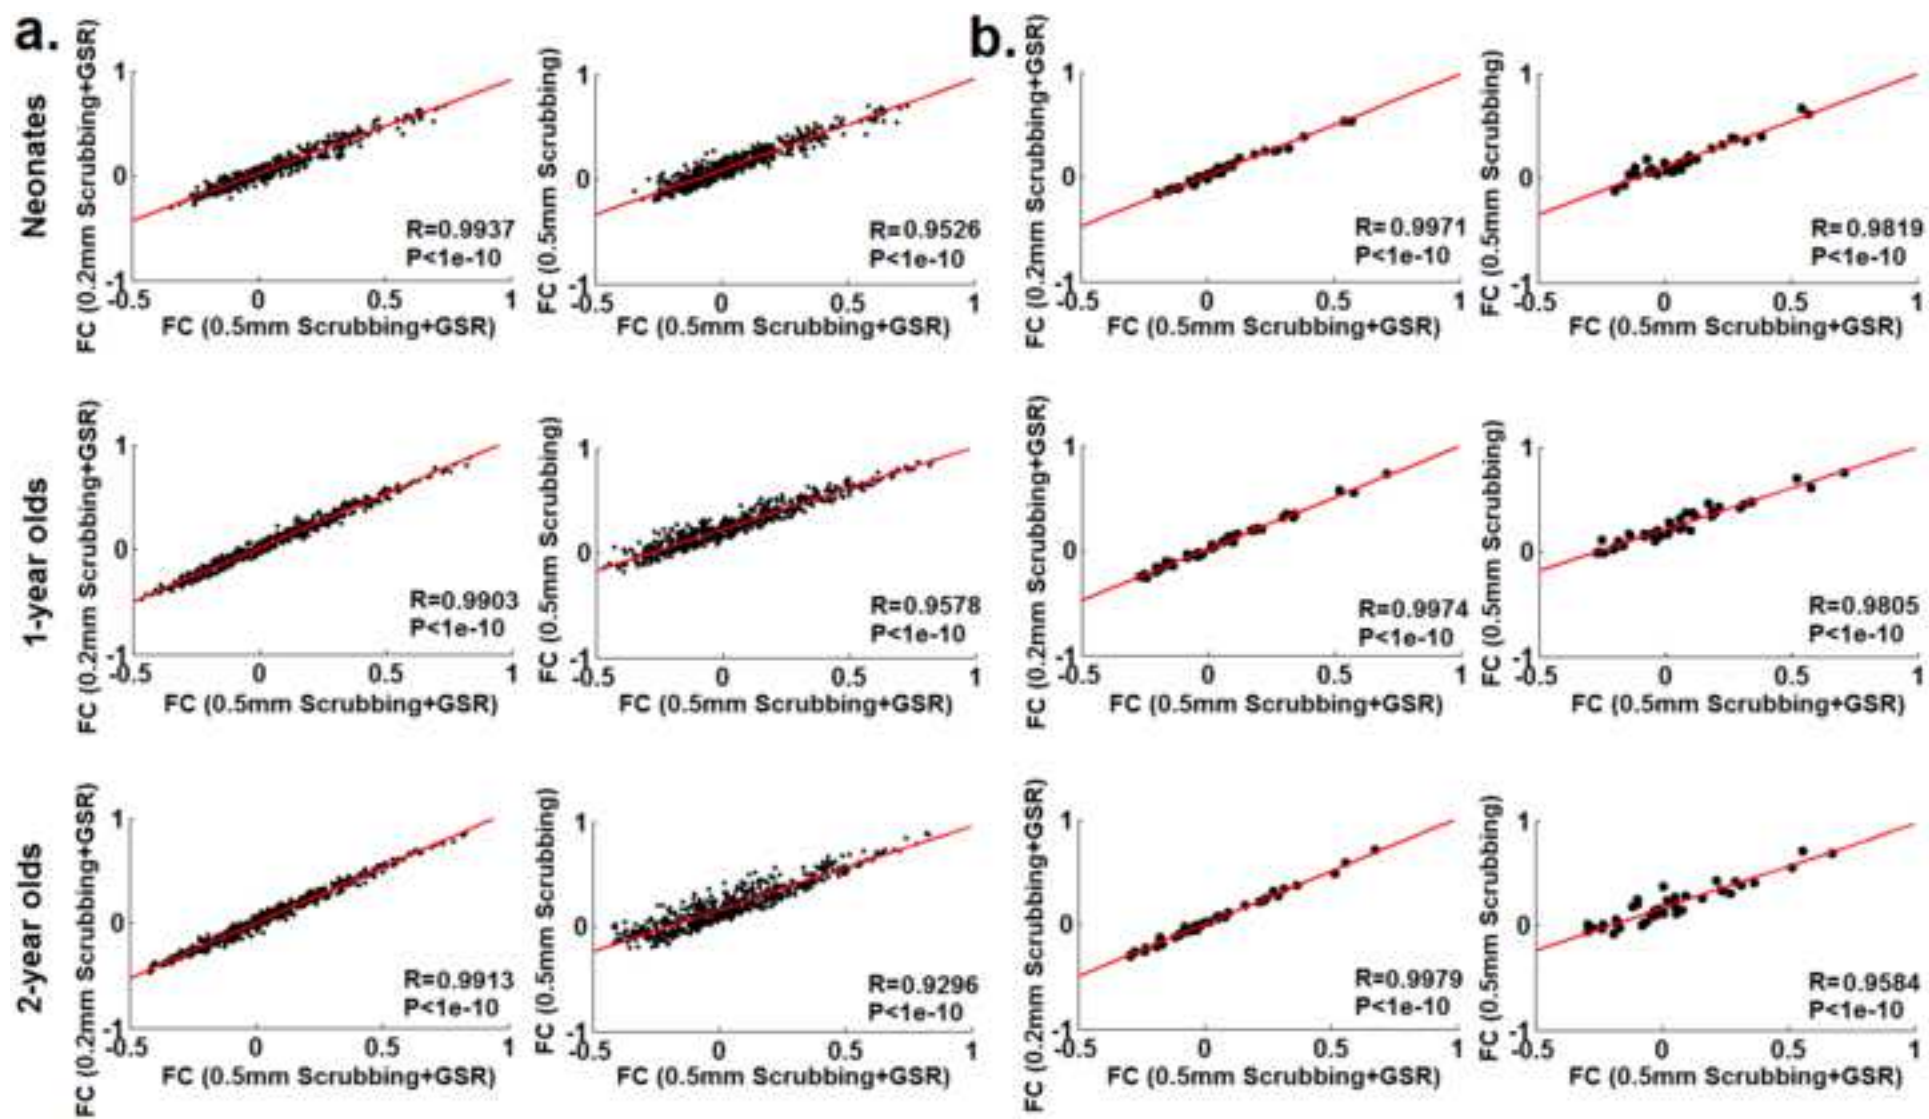

Figure. S4  
[Click here to download high resolution image](#)

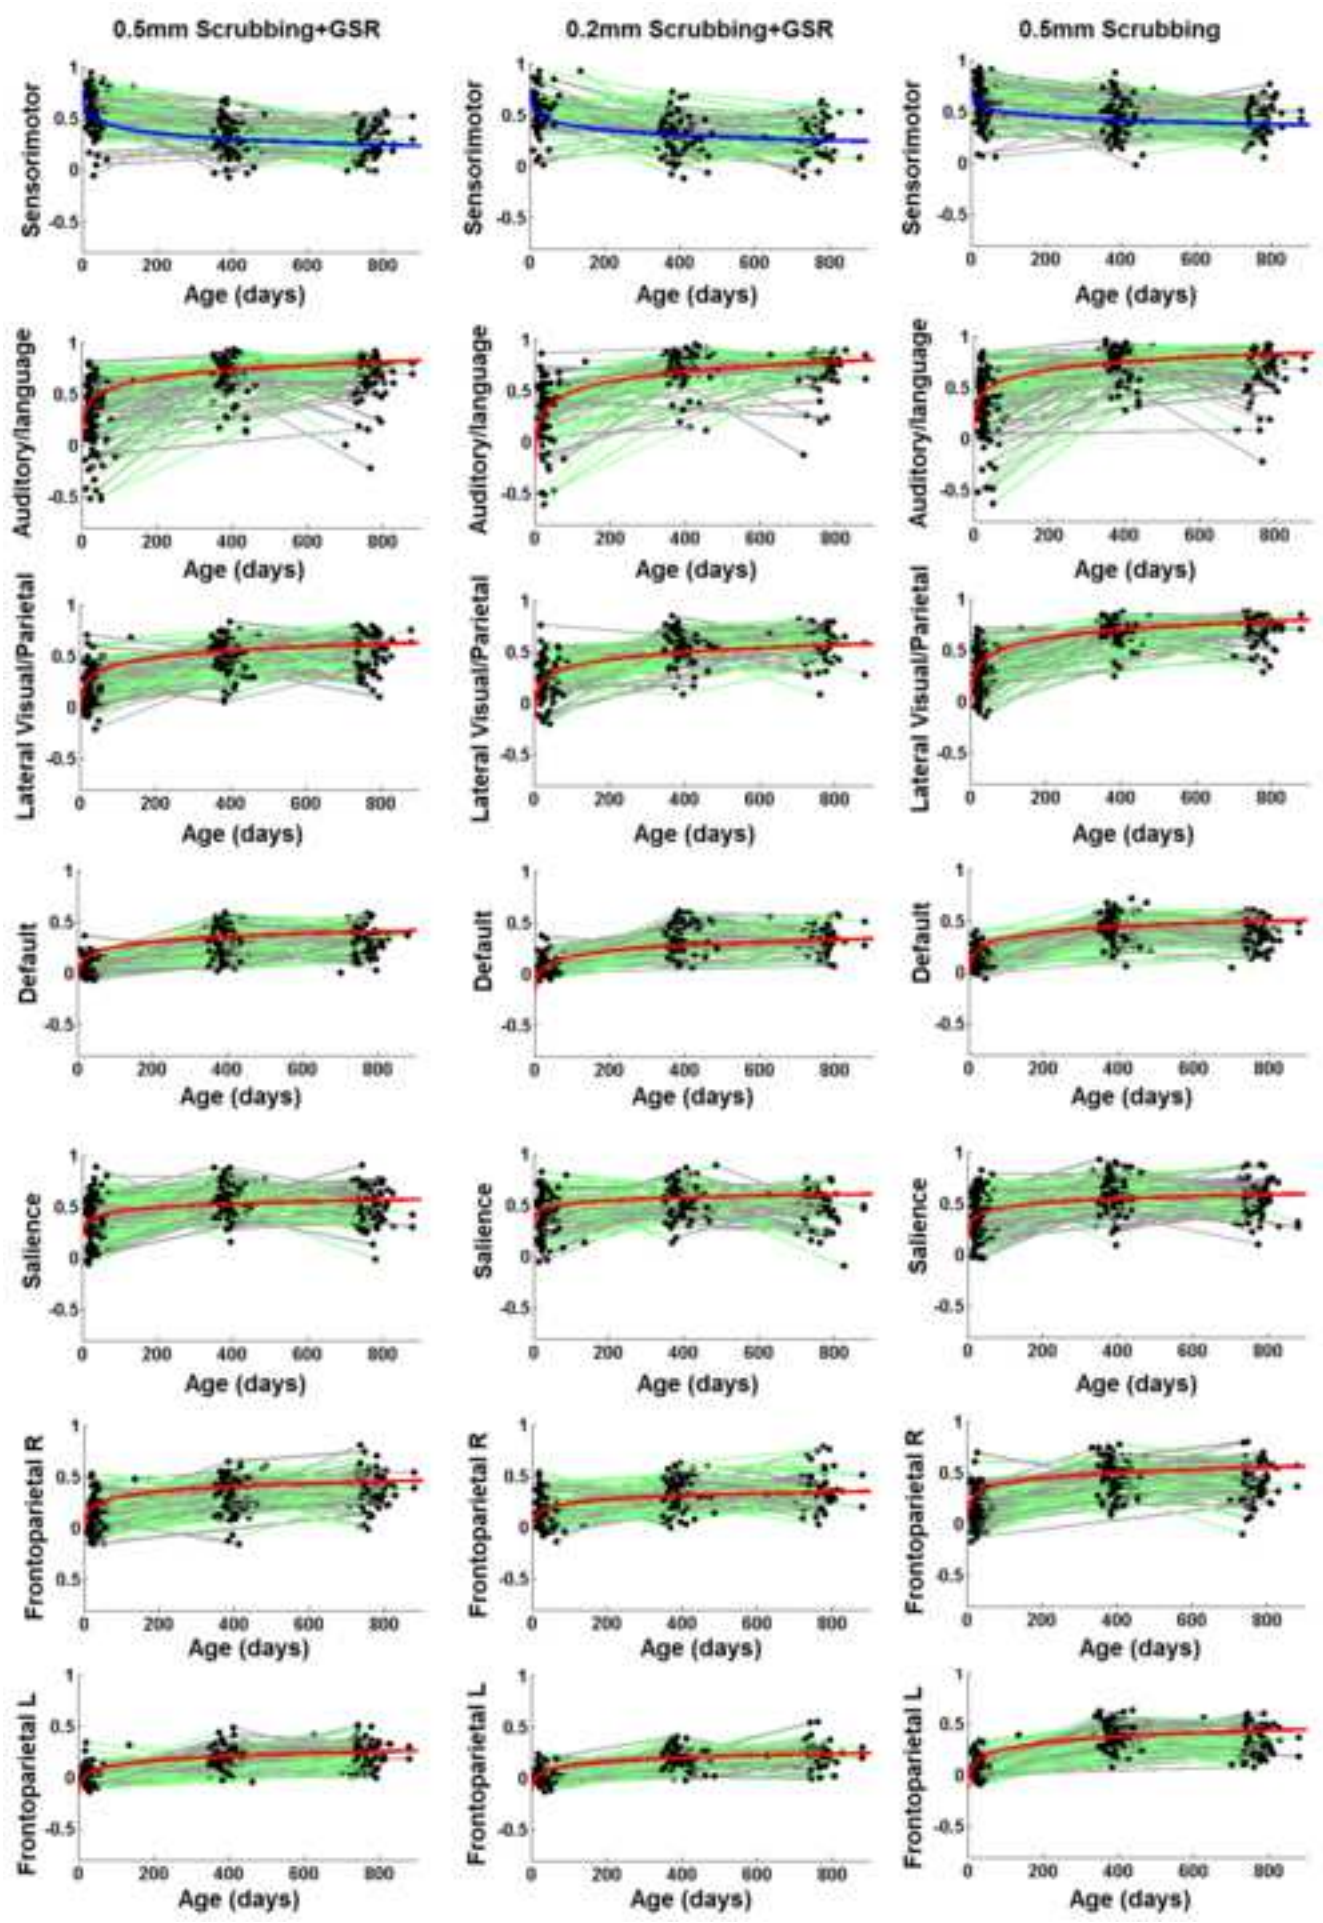

Supplement: NIHMS780302-supplement-supplement_1.pdf [file NIHMS780302-supplement-supplement_1.pdf]
